# Supplementary figures and images for: Wild Stinging Nettle (Urtica dioica L.) Leaves and Roots Chemical Composition and Phenols Extraction
Source: MDPI journal article supplement (doi:10.3390/plants12020309), 2023-01-09

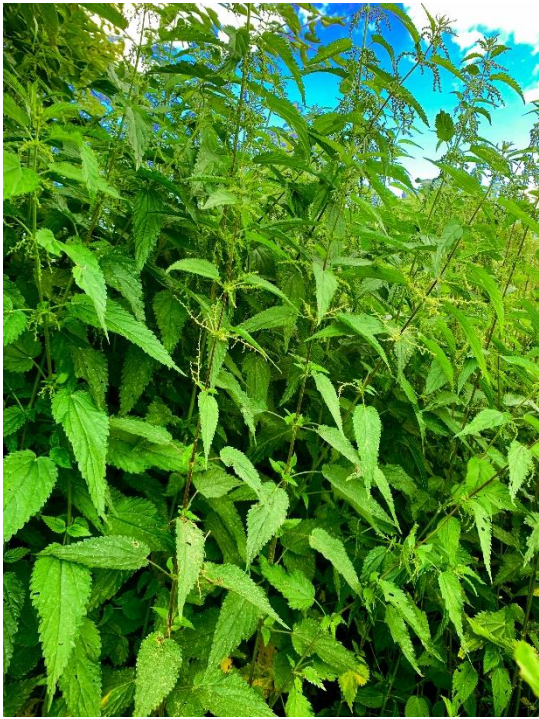

Figure S1. *Urtica dioica* L in natural environment (photo was made by Miglė Vitkauskaitė)

Supplement: s1 [file s1]
